# Supplementary material for: Genome-Wide Analysis of the Salmonella Fis Regulon and Its Regulatory Mechanism on Pathogenicity Islands
Source: PLoS One. 2013 May 23;8(5):e64688. doi: 10.1371/journal.pone.0064688 (PMC3662779; doi:10.1371/journal.pone.0064688)
Supplement: Table S8 — The SPI genes regulated by Fis under three regulatory mechanism. (XLS) [file pone.0064688.s010.xls]

## Sheet: Sheet1
Table S8. The SPI genes regulated by Fis under three regulatory mechanism
SPI genea	Regulatory mode	Fold ratiob
avrA	Ⅰc	3.06
sprB	Ⅱd	>270.96g
hilC	Ⅰ	5.45
orgC	Ⅱ	4.21
orgB	Ⅰ	4.78
orgA	Ⅰ	4.85
prgK	Ⅱ	6.68
prgJ	Ⅱ	8.79
prgI	Ⅱ	>599.75
prgH	Ⅱ	5.55
hilD	Ⅱ	3.33
hilA	Ⅱ	5.48
iagB	Ⅰ	5.32
iacP	Ⅳf	1.84
sipA	Ⅰ	3.5
sipD	Ⅱ	4.18
sipC	Ⅰ	5.21
sipB	Ⅰ	5.71
sicA	Ⅰ	5.85
spaS	Ⅰ&Ⅲe	4.55
spaR	Ⅲ	>60.67
spaQ	Ⅲ	7.37
spaP	Ⅲ	4.57
spaO	Ⅰ	>191.46
invJ	Ⅲ	>287.86
invI	Ⅲ	8.11
invC	Ⅰ	7.12
invB	Ⅲ	6.41
invA	Ⅲ	6.63
invE	Ⅰ	7.47
invG	Ⅰ	7.51
invF	Ⅱ	5.25
invH	Ⅱ	4.65
STM2903	Ⅰ	NAh
STM2904	Ⅳ	1.13
STM2905	Ⅳ	2.02
pphB	Ⅳ	1.78
STM2911	Ⅳ	-1.63
STM2912	Ⅳ	-1.03
orf245	Ⅳ	>7.34
orf408	Ⅰ	>6.25
ttrB	Ⅳ	-2.45
ttrS	Ⅰ	2.02
ttrR	Ⅳ	1.97
orf70	Ⅳ	1.41
orf319	Ⅳ	1.03
ssrB	Ⅱ	1.1
ssrA	Ⅰ	1.52
sseD	Ⅱ	1.68
sseE	Ⅱ	3.07
sscB	Ⅰ	3.5
ssaG	Ⅱ	NA
ssaH	Ⅱ	>2.97
ssaI	Ⅱ	>0.91
ssaJ	Ⅱ	>2.11
STM1410	Ⅰ	1.64
ssaL	Ⅱ	>11.09
ssaV	Ⅰ	1.05
ssaN	Ⅰ	1.85
ssaR	Ⅱ	2.05
ssaS	Ⅱ	NA
ssaT	Ⅱ	-1.79
ssaU	Ⅰ	-2.99
a Obtained from NC_003197 build of LT2. b Log2 of expression ratios (ratio of RPKM in wild-type and fis deletion mutant samples) in mid-exponential phase. c SPI genes are regulated by Fis through directly Fis-binding. d Fis regulates SPI genes through controlling expression of SPI regulators. e Fis regulates SPI genes by binding to their upstream genes. f The regulatory mode is unclear. g “>NUM” …
